# Supplementary material for: Who Is Vulnerable to Dengue Fever? A Community Survey of the 2014 Outbreak in Guangzhou, China
Source: PubMed Central journal article supplement (PMC4962253; doi:10.3390/ijerph13070712), 2016-07-14

# Who Is Vulnerable to Dengue Fever? A Community Survey of the 2014 Outbreak in Guangzhou, China

Bin Chen, Jun Yang, Lei Luo, Zhicong Yang and Qiyong Liu

**Text S1.** The summary of Diagnostic Criteria for Dengue Fever by Chinese Ministry of Health (WS 216-2008). (Issued on 28 February 2008)

## 1. Epidemiologic Linkage

- 1.1. Travel to a dengue endemic country/region within previous 14 days of dengue-like illness
- 1.2. Around the place of residence or place of work (e.g., 100 m radius), there have been dengue case(s) within one month.

## 2. Clinical Description

- 2.1. Sudden onset, fever (39–40 °C within 24–36 h, someone shows biphasic fever); severe headache, retro-orbital pain, myalgia, arthralgia and fatigue; flushed skin on face, neck and chest, and conjunctival congestion, etc.
- 2.2. Rash: measles-like rash, scarlatiniform rash, and/or needle-like hemorrhagic rash in the limbs, trunk, head and face in the course of illness (days 5–7); itching; no scaling; continued 3–5 days.
- 2.3. Bleeding tendency (tourniquet test positive): petechia, ecchymoses, purpura and injection site bleeding, or bleeding from the mucous membranes of mouth and nose, gastrointestinal bleeding, hemoptysis.
- 2.4. Hematuria and vaginal bleeding in the course of illness (days 5–8).
- 2.5. Massive hemorrhage of gastrointestinal tract, or chest and abdominal cavity bleeding, or intracranial hemorrhage.
- 2.6. Liver enlargement, pleural or pericardial effusion.
- 2.7. Shock syndrome: clammy skin, restlessness, rapid and weak pulse and narrow pulse pressure < 20 mmHg (2.7 kPa) and undetectable in blood pressure, oliguria etc.

## 3. Laboratory Tests

- 3.1. A total white blood cell count decrease.
- 3.2. Thrombocytopenia ( $<100 \times 10^9/L$ ).
- 3.3. Hemoconcentration (an increase in hematocrit  $\geq 20\%$  above average for age or a decrease in hematocrit  $\geq 20\%$  of baseline following fluid replacement therapy); hypoproteinemia.
- 3.4. IgG or IgM anti-DENV positive in a serum specimen.
- 3.5. Cell culture isolation of DENV by *Aedes albopictus* C6/36 cell or 1–3 day-old newborn mice in acute serum, cerebrospinal fluid, blood, or other tissue specimens.
- 3.6. IgG anti-DENV  $\geq 4$ -fold rise in titer in paired acute and convalescent serum samples. The serologic tests included ELISA, mac-ELISA, HI, FA/IFA, NT.
- 3.7. Detection of DENV nucleic acid by RT-PCR or real-time fluorescence quantitative PCR.

## 4. Diagnosis and Classification

- 4.1. Suspected case: a patient with item 1.1 and 2.1, or a patient with item 2.1, 3.1 and 3.2, as defined above.
- 4.2. Clinically diagnosed case:
  - DF: a suspected case with 1.2, 3.1 and 3.2; or a suspect case with item 2.1, 3.1, 3.2 and 3.4
  - DHF: a clinically diagnosed case of DF with item 3.2, 3.3 and one of item 2.3 to 2.5.
  - DSS: a clinically diagnosed case of DHF with item 2.6.
- 4.3. Confirmed case: a clinically diagnosed case with one of item 3.5 to 3.7.

**Table S1.** The specification of variable assignment.

| Variables                          | Specification                                                                                                                        | Remarks             |
|------------------------------------|--------------------------------------------------------------------------------------------------------------------------------------|---------------------|
| Occupation                         | 1 = Farmer, 2 = Merchant, 3 = Office worker, 4 = Laborer, 5 = Unemployed, 6 = Retiree, 7 = Student (as reference of dummy variables) | Covariates Variable |
| Using repellent                    | 0 = No, 1 = Yes                                                                                                                      | Covariates Variable |
| Using bed net                      | 0 = No, 1 = Yes                                                                                                                      | Covariates Variable |
| Cleaning trash/water of dwellings  | 0 = No, 1 = Yes                                                                                                                      | Covariates Variable |
| Screen windows and doors           | 0 = No, 1 = Yes                                                                                                                      | Covariates Variable |
| Using mosquito coils               | 0 = No, 1 = Yes                                                                                                                      | Covariates Variable |
| Plant with water container         | 0 = No, 1 = Yes                                                                                                                      | Covariates Variable |
| Awareness of Dengue mosquito bites | 0 = No, 1 = Yes                                                                                                                      | Covariates Variable |
| Using air-conditioner              | 1 = Lacking air conditioner (or using it less than six hours), 0 = Using air-conditioner regularly (or using it more than six hours) | Covariates Variable |
| Type of housing                    | 1 = Living in old apartment/sheds/temporary building, 0 = High-rise building (with elevator)                                         | Covariates Variable |
| Dengue fever                       | 0 = Negative, 1 = Positive                                                                                                           | Dependent Variable  |

**Table S2.** Variables not in the Equation of logistic regression.

| Steps               | Variables Evaluation | Excluded Variables                | Score | df    | Sig.  |
|---------------------|----------------------|-----------------------------------|-------|-------|-------|
| Step 2 <sup>a</sup> | Variables            | Screen                            | 0.104 | 1     | 0.747 |
|                     | Overall Statistics   |                                   | 0.104 | 1     | 0.747 |
| Step 3 <sup>b</sup> | Variables            | Mosquito bites                    | 1.004 | 1     | 0.316 |
|                     |                      | Screen                            | 0.028 | 1     | 0.866 |
|                     | Overall Statistics   |                                   | 1.106 | 2     | 0.575 |
| Step 4 <sup>c</sup> | Variables            | Occupation (student as reference) | 7.115 | 6     | 0.31  |
|                     |                      | Occupation (Farmer)               | 1.658 | 1     | 0.198 |
|                     |                      | Occupation (Merchant)             | 3.148 | 1     | 0.076 |
|                     |                      | Occupation (Office worker)        | 0.163 | 1     | 0.687 |
|                     |                      | Occupation (Laborer)              | 0.706 | 1     | 0.401 |
|                     |                      | Occupation (unemployed)           | 2.422 | 1     | 0.12  |
|                     |                      | Occupation (Retiree)              | 0.058 | 1     | 0.81  |
|                     |                      | Mosquito bites                    | 0.883 | 1     | 0.347 |
|                     |                      | Screen                            | 0.023 | 1     | 0.878 |
| Overall Statistics  |                      | 8.208                             | 8     | 0.413 |       |
| Step 5 <sup>d</sup> | Variables            | Lack of air-conditioner           | 2.158 | 1     | 0.142 |
|                     |                      | Occupation (student as reference) | 7.024 | 6     | 0.319 |
|                     |                      | Occupation (Farmer)               | 1.211 | 1     | 0.271 |
|                     |                      | Occupation (Merchant)             | 2.893 | 1     | 0.089 |
|                     |                      | Occupation (Office worker)        | 0.309 | 1     | 0.578 |
|                     |                      | Occupation (Laborer)              | 1.213 | 1     | 0.271 |
|                     |                      | Occupation (unemployed)           | 2.411 | 1     | 0.12  |
|                     |                      | Occupation (Retiree)              | 0.126 | 1     | 0.723 |
|                     |                      | Mosquito bites                    | 0.875 | 1     | 0.35  |
| Screen              | 0.027                | 1                                 | 0.87  |       |       |
| Overall Statistics  |                      | 10.317                            | 9     | 0.325 |       |

<sup>a</sup> Variable(s) removed on step 2: Screen; <sup>b</sup> Variable(s) removed on step 3: Mosquito bites; <sup>c</sup> Variable(s) removed on step 4: Occupation; <sup>d</sup> Variable(s) removed on step 5: Lack of air-conditioner.

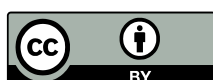

Supplement: ijerph-13-00712-s001.pdf [file ijerph-13-00712-s001.pdf]
